# Supplementary material for: WatAA: Atlas of Protein Hydration. Exploring synergies between data mining and ab initio calculations
Source: Royal Society of Chemistry journal article supplement (doi:10.1039/c7cp00187h), 2017-01-01
Supplement: c7cp00187h1.csv [file c7cp00187h1.csv]

File F1: Data for the 323 hydration sites in comma-separated values (CSV) file format.
Hydration site	Category	# AA	# WAT	HS occupancy	Nearest atom (cryst)	Eint(cryst) [kcal/mol]	d(cryst) [Å]	Nearest atom (opt)	Eint(opt) [kcal/mol]	d(opt) [Å]	Δx [Å]
Ala_H_NA_HS1	Ala_H_NA	21737	12953	0.38	O	-4.1638	2.8368	O	-4.1659	2.8358	0
Ala_H_NA_HS2	Ala_H_NA	21737	12953	0.12	N	-3.689	2.8743	N	-3.8238	2.9289	0.15
Ala_E_NA_HS1	Ala_E_NA	8532	3542	0.09	N	-3.5171	2.9336	N	-3.5348	2.9457	0.11
Ala_E_NA_HS2	Ala_E_NA	8532	3542	0.06	O	-3.6238	2.7583	O	-3.8828	2.8255	0.42
Ala_E_NA_HS3	Ala_E_NA	8532	3542	0.05	O	-2.6855	2.7875	O	-2.7928	2.8551	0.07
Arg_H_g-_HS1	Arg_H_g-	569	1505	0.39	O	-4.3681	2.81	O	-4.443	2.783	0.06
Arg_H_g-_HS2	Arg_H_g-	569	1505	0.38	NH2	-3.4663	2.7443	NH2	-3.8558	2.8749	0.13
Arg_H_g-_HS3	Arg_H_g-	569	1505	0.35	NH1	-4.6011	2.6426	NH1	-5.6511	2.8063	0.18
Arg_H_g-_HS4	Arg_H_g-	569	1505	0.27	NE	-4.9659	2.9403	NE	-6.927	2.8767	1.02
Arg_H_g-_HS5	Arg_H_g-	569	1505	0.25	NH1	-5.0732	2.8018	NH1	-5.0739	2.8038	0.01
Arg_H_g+_HS1	Arg_H_g+	22	53	0.33	NH1	-4.7995	2.8789	NH1	-4.8377	2.8495	0.04
Arg_H_g+_HS2	Arg_H_g+	22	53	0.33	NH1	-4.9222	2.9723	NH1	-6.2323	2.8624	0.49
Arg_H_g+_HS3	Arg_H_g+	22	53	0.16	NE	-4.0013	2.823	NE	-6.2544	2.8633	1.54
Arg_H_g+_HS4	Arg_H_g+	22	53	0.14	NH2	-3.9344	3.0811	NE	-6.3817	2.873	1.07
Arg_H_g+_HS5	Arg_H_g+	22	53	0.13	O	-3.8541	2.6692	O	-4.3654	2.8072	0.44
Arg_H_t_HS1	Arg_H_t	167	323	0.52	O	-4.4767	2.7792	O	-4.6237	2.7488	0.16
Arg_H_t_HS2	Arg_H_t	167	323	0.45	NH1	-4.3073	3.006	NH1	-4.8233	2.8476	0.16
Arg_H_t_HS3	Arg_H_t	167	323	0.14	NE	-3.4752	2.6251	NE	-6.4475	2.8616	1.29
Arg_H_t_HS4	Arg_H_t	167	323	0.13	NH1	-5.4089	3.0433	NH1	-6.3895	2.8658	0.3
Arg_H_t_HS5	Arg_H_t	167	323	0.11	O	-3.5384	2.8885	O	-3.7457	2.7753	0.16
Arg_E_g-_HS1	Arg_E_g-	157	233	0.2	NH2	-5.0622	2.9089	NH2	-5.2981	2.8243	0.13
Arg_E_g-_HS2	Arg_E_g-	157	233	0.19	NE	-4.1707	2.7185	NE	-4.5871	2.8318	0.12
Arg_E_g+_HS1	Arg_E_g+	78	128	0.33	NH1	-3.8967	3.1841	NH1	-7.05	2.9649	1.15
Arg_E_g+_HS2	Arg_E_g+	78	128	0.24	NE	-3	2.6431	NE	-5.1047	2.8336	0.89
Arg_E_g+_HS3	Arg_E_g+	78	128	0.17	NH2	-1.7517	2.5351	NH2	-4.717	2.8444	0.33
Arg_E_g+_HS4	Arg_E_g+	78	128	0.16	NH1	-4.2155	2.9238	NH1	-6.6571	2.8779	1.44
Arg_E_g+_HS5	Arg_E_g+	78	128	0.12	NH2	-4.1849	2.7827	NH2	-4.3383	2.8541	0.13
Arg_E_t_HS1	Arg_E_t	107	229	0.25	NE	-3.6541	2.7036	NE	-4.7833	2.8554	0.45
Arg_E_t_HS2	Arg_E_t	107	229	0.22	NH1	-2.9493	3.2055	NH1	-4.4868	2.856	0.36
Arg_E_t_HS3	Arg_E_t	107	229	0.14	NH2	-4.6771	2.9082	NH2	-4.8594	2.82	0.11
Arg_E_t_HS4	Arg_E_t	107	229	0.13	NH1	-4.2412	3.0161	NH1	-5.1637	2.8219	0.56
Arg_E_t_HS5	Arg_E_t	107	229	0.11	O	-2.6041	3.0106	O	-3.2823	2.829	0.31
Asn_H_g-_HS1	Asn_H_g-	3661	8385	0.47	ND2	-3.5227	2.8804	ND2	-3.5476	2.9347	0.39
Asn_H_g-_HS2	Asn_H_g-	3661	8385	0.38	O	-4.1516	2.7957	O	-4.2859	2.7774	0.05
Asn_H_g-_HS3	Asn_H_g-	3661	8385	0.31	ND2	-2.8085	2.8341	ND2	-3.03	2.9575	0.13
Asn_H_g-_HS4	Asn_H_g-	3661	8385	0.2	OD1	-3.234	2.7266	OD1	-3.3601	2.8099	0.11
Asn_H_g-_HS5	Asn_H_g-	3661	8385	0.19	OD1	-2.9728	2.5909	OD1	-3.7859	2.7956	0.21
Asn_H_g-_HS6	Asn_H_g-	3661	8385	0.15	OD1	-3.6904	2.6909	OD1	-4.2195	2.7835	0.53
Asn_H_g+_HS1	Asn_H_g+	134	245	0.29	N	-3.4649	2.8867	N	-3.3113	3.0012	0.34
Asn_H_g+_HS2	Asn_H_g+	134	245	0.22	ND2	-3.1828	2.9295	ND2	-3.1837	2.9618	0.05
Asn_H_g+_HS3	Asn_H_g+	134	245	0.21	O	-4.7028	2.7947	O	-4.7034	2.7838	0.02
Asn_H_g+_HS4	Asn_H_g+	134	245	0.19	OD1	-3.1744	2.6489	OD1	-3.7801	2.819	0.19
Asn_H_g+_HS5	Asn_H_g+	134	245	0.14	ND2	-2.6041	2.8502	ND2	-2.8134	2.9665	0.12
Asn_H_t_HS1	Asn_H_t	659	1349	0.4	ND2	-3.6958	2.9774	ND2	-3.7267	2.9208	0.06
Asn_H_t_HS2	Asn_H_t	659	1349	0.16	ND2	-2.8836	2.8353	ND2	-3.1461	2.9513	0.15
Asn_H_t_HS3	Asn_H_t	659	1349	0.15	OD1	-2.5227	2.4959	OD1	-4.7946	2.7786	0.4
Asn_H_t_HS4	Asn_H_t	659	1349	0.12	OD1	-0.6453	2.7042	OD1	-2.7124	2.8366	0.99
Asn_H_t_HS5	Asn_H_t	659	1349	0.11	OD1	-3.6293	2.6491	OD1	-4.2976	2.7794	0.77
Asn_E_g-_HS1	Asn_E_g-	1025	2095	0.17	N	-3.895	2.8965	N	-3.8952	2.8964	0
Asn_E_g-_HS2	Asn_E_g-	1025	2095	0.14	ND2	-2.5813	2.8037	ND2	-2.9879	2.967	0.18
Asn_E_g-_HS3	Asn_E_g-	1025	2095	0.12	OD1	-3.8007	2.6338	OD1	-4.2763	2.7827	0.17
Asn_E_g-_HS4	Asn_E_g-	1025	2095	0.11	ND2	-2.2794	2.7222	ND2	-3.2732	2.9519	0.38
Asn_E_g+_HS1	Asn_E_g+	250	355	0.26	ND2	-2.5543	2.7893	ND2	-3.1327	2.978	0.22
Asn_E_g+_HS2	Asn_E_g+	250	355	0.16	ND2	-2.7408	3.0096	ND2	-2.7439	2.9888	0.02
Asn_E_g+_HS3	Asn_E_g+	250	355	0.13	O	-2.8716	2.7521	O	-2.967	2.8161	0.07
Asn_E_t_HS1	Asn_E_t	688	1202	0.2	ND2	-2.7521	2.9134	ND2	-2.7869	2.9981	0.1
Asn_E_t_HS2	Asn_E_t	688	1202	0.15	N	-1.8528	2.6399	N	-3.8111	2.9271	0.3
Asn_E_t_HS3	Asn_E_t	688	1202	0.14	OD1	-2.5514	2.5895	OD1	-3.506	2.7893	0.24
Asn_E_t_HS4	Asn_E_t	688	1202	0.13	ND2	-2.803	2.8077	ND2	-3.1827	2.955	0.15
Asp_H_g-_HS1	Asp_H_g-	6311	17873	0.34	O	-4.3473	2.8056	O	-4.4597	2.7879	0.04
Asp_H_g-_HS2	Asp_H_g-	6311	17873	0.31	OD2	-7.7665	2.6126	OD2	-7.8704	2.6821	0.28
Asp_H_g-_HS3	Asp_H_g-	6311	17873	0.19	OD1	-5.1451	2.4661	OD1	-6.592	2.6882	0.22
Asp_H_g-_HS4	Asp_H_g-	6311	17873	0.16	OD2	-4.9408	2.4585	OD2	-6.6441	2.6837	0.45
Asp_H_g-_HS5	Asp_H_g-	6311	17873	0.14	N	-4.5141	2.933	N	-5.2013	3.0188	0.43
Asp_H_g-_HS6	Asp_H_g-	6311	17873	0.13	OD1	-5.6765	2.6379	OD1	-5.767	2.6875	0.06
Asp_H_g-_HS7	Asp_H_g-	6311	17873	0.12	OD1	-6.9695	2.6579	OD1	-6.9952	2.6598	0
Asp_H_g+_HS1	Asp_H_g+	287	706	0.21	O	-4.3584	2.887	O	-4.6561	2.7647	0.19
Asp_H_g+_HS2	Asp_H_g+	287	706	0.2	OD1	-4.3802	2.9075	OD1	-5.3115	2.6973	1.11
Asp_H_g+_HS3	Asp_H_g+	287	706	0.16	OD2	-7.4564	2.5312	OD2	-7.9021	2.6789	0.22
Asp_H_g+_HS4	Asp_H_g+	287	706	0.16	OD1	-1.4544	2.4047	OD1	-6.0736	2.7282	0.33
Asp_H_t_HS1	Asp_H_t	1045	2512	0.25	OD1	-6.658	2.4725	OD1	-8.0188	2.682	0.21
Asp_H_t_HS2	Asp_H_t	1045	2512	0.24	OD2	-6.8812	2.8623	OD2	-7.8464	2.6778	0.33
Asp_H_t_HS3	Asp_H_t	1045	2512	0.19	OD1	-2.4597	2.6409	OD1	-7.4756	2.6892	3.27
Asp_H_t_HS4	Asp_H_t	1045	2512	0.17	OD2	-6.8831	2.5498	OD2	-7.4567	2.6703	0.81
Asp_H_t_HS5	Asp_H_t	1045	2512	0.16	OD1	-6.5382	2.5592	OD1	-6.8951	2.6873	0.14
Asp_H_t_HS6	Asp_H_t	1045	2512	0.12	N	-3.732	2.9954	N	-3.8869	2.9329	0.41
Asp_E_g-_HS1	Asp_E_g-	1240	3104	0.25	N	-3.8946	2.9233	OD2	-6.7962	2.8871	1.26
Asp_E_g-_HS2	Asp_E_g-	1240	3104	0.2	OD2	-8.13	2.6365	OD2	-8.1002	2.6822	0.11
Asp_E_g-_HS3	Asp_E_g-	1240	3104	0.18	OD2	-6.7831	2.4993	OD2	-7.5778	2.6639	0.52
Asp_E_g-_HS4	Asp_E_g-	1240	3104	0.17	OD1	-7.6066	2.7083	OD1	-10.0621	2.7125	2.49
Asp_E_g-_HS5	Asp_E_g-	1240	3104	0.15	OD1	-7.1295	2.5728	OD1	-7.291	2.6774	0.29
Asp_E_g-_HS6	Asp_E_g-	1240	3104	0.11	OD1	-5.2675	2.7247	OD1	-7.0521	2.6929	1.54
Asp_E_g+_HS1	Asp_E_g+	232	461	0.25	OD2	-7.2943	2.5019	OD2	-7.8886	2.6624	0.18
Asp_E_g+_HS2	Asp_E_g+	232	461	0.22	OD2	-6.7736	2.6454	OD2	-6.7622	2.6871	0.05
Asp_E_g+_HS3	Asp_E_g+	232	461	0.11	O	-2.1626	2.5356	O	-3.605	2.7836	0.26
Asp_E_t_HS1	Asp_E_t	1402	3140	0.26	OD2	-8.1661	2.573	OD2	-8.2839	2.6688	0.11
Asp_E_t_HS2	Asp_E_t	1402	3140	0.22	OD2	-7.4537	2.5547	OD2	-7.5894	2.6532	0.1
Asp_E_t_HS3	Asp_E_t	1402	3140	0.14	OD1	-5.5097	2.5336	OD1	-6.691	2.6799	0.69
Asp_E_t_HS4	Asp_E_t	1402	3140	0.14	N	-1.5439	2.6499	N	-3.5893	2.9372	0.4
Asp_E_t_HS5	Asp_E_t	1402	3140	0.1	O	-3.4531	2.708	O	-3.5288	2.7797	0.08
Cys_H_g-_HS1	Cys_H_g-	1438	492	0.15	O	-3.2837	2.6099	O	-4.0375	2.8095	0.21
Cys_H_g+_HS1	Cys_H_g+	95	69	0.34	N	-4.4284	3.0013	N	-5.0411	2.9426	0.37
Cys_H_g+_HS2	Cys_H_g+	95	69	0.28	O	-5.4214	2.7409	O	-5.4316	2.7634	0.08
Cys_H_t_HS1	Cys_H_t	442	131	0.14	O	-4.3786	2.8332	O	-4.7834	2.7838	0.35
Cys_E_g-_HS1	Cys_E_g-	1050	565	0.19	N	-3.9436	2.8787	N	-3.9755	2.9112	0.06
Cys_E_t_HS1	Cys_E_t	752	389	0.15	N	-2.8157	2.7038	N	-3.9514	2.9229	0.28
Gln_H_g-_HS1	Gln_H_g-	1865	3913	0.33	O	-4.4148	2.8063	O	-4.495	2.8012	0.31
Gln_H_g-_HS2	Gln_H_g-	1865	3913	0.23	OE1	-4.3079	2.6903	OE1	-4.4738	2.7686	0.38
Gln_H_g-_HS3	Gln_H_g-	1865	3913	0.19	OE1	-3.6674	2.6351	OE1	-4.2126	2.7724	0.3
Gln_H_g-_HS4	Gln_H_g-	1865	3913	0.16	NE2	-2.87	2.9006	NE2	-2.9194	2.9444	0.04
Gln_H_g-_HS5	Gln_H_g-	1865	3913	0.13	NE2	-2.8908	2.7689	NE2	-3.4865	2.9412	0.2
Gln_H_g+_HS1	Gln_H_g+	39	70	0.21	O	-4.8024	2.7269	O	-4.902	2.8021	0.15
Gln_H_g+_HS2	Gln_H_g+	39	70	0.19	N	-3.8654	2.8366	N	-4.2936	2.949	0.15
Gln_H_g+_HS3	Gln_H_g+	39	70	0.16	OE1	-4.0265	2.5957	OE1	-4.7196	2.7756	0.32
Gln_H_g+_HS4	Gln_H_g+	39	70	0.14	O	-3.6116	2.8796	O	-4.1474	2.8008	0.52
Gln_H_g+_HS5	Gln_H_g+	39	70	0.11	NE2	0.8664	2.5902	NE2	-3.0292	2.9355	1.54
Gln_H_g+_HS6	Gln_H_g+	39	70	0.11	OE1	-4.1835	2.8332	OE1	-4.4936	2.7787	0.57
Gln_H_g+_HS7	Gln_H_g+	39	70	0.1	NE2	-2.7447	3.0139	NE2	-2.9892	2.9527	0.57
Gln_H_t_HS1	Gln_H_t	932	1578	0.24	OE1	-5.3232	2.6952	OE1	-5.3562	2.7779	0.09
Gln_H_t_HS2	Gln_H_t	932	1578	0.17	N	-3.532	2.764	N	-4.037	2.9263	0.16
Gln_H_t_HS3	Gln_H_t	932	1578	0.16	NE2	-2.9402	2.8642	NE2	-3.0209	2.9464	0.09
Gln_H_t_HS4	Gln_H_t	932	1578	0.14	OE1	-4.1906	2.6377	OE1	-4.5823	2.7912	0.18
Gln_H_t_HS5	Gln_H_t	932	1578	0.13	OE1	-3.8531	2.5425	OE1	-5.0945	2.7473	0.46
Gln_E_g-_HS1	Gln_E_g-	403	801	0.19	OE1	-4.2926	2.6046	OE1	-4.7535	2.7516	0.16
Gln_E_g-_HS2	Gln_E_g-	403	801	0.18	NE2	-3.0967	2.9217	NE2	-3.1137	2.9536	0.04
Gln_E_g-_HS3	Gln_E_g-	403	801	0.14	OE1	-3.5078	2.5633	OE1	-4.4661	2.7605	0.2
Gln_E_g-_HS4	Gln_E_g-	403	801	0.13	NE2	-3.0064	2.8343	NE2	-3.1723	2.9497	0.12
Gln_E_g-_HS5	Gln_E_g-	403	801	0.11	N	-3.7246	2.9206	N	-3.7815	2.9194	0.41
Gln_E_g+_HS1	Gln_E_g+	126	225	0.18	NE2	-2.9033	2.9482	NE2	-2.9031	2.9484	0
Gln_E_g+_HS2	Gln_E_g+	126	225	0.18	OE1	-4.3441	2.6324	OE1	-4.6441	2.7677	0.14
Gln_E_g+_HS3	Gln_E_g+	126	225	0.17	OE1	-3.54	2.5876	OE1	-4.2823	2.7696	0.2
Gln_E_g+_HS4	Gln_E_g+	126	225	0.14	NE2	-2.0037	2.778	NE2	-2.883	2.9757	0.39
Gln_E_g+_HS5	Gln_E_g+	126	225	0.11	O	-2.7165	2.6682	O	-3.0358	2.7983	0.14
Gln_E_t_HS1	Gln_E_t	493	1027	0.25	OE1	-4.4125	2.7107	OE1	-4.5233	2.7899	0.09
Gln_E_t_HS2	Gln_E_t	493	1027	0.22	NE2	-2.7513	2.9208	NE2	-2.8946	2.9714	0.06
Gln_E_t_HS3	Gln_E_t	493	1027	0.21	NE2	-2.691	2.8566	NE2	-2.8666	2.9471	0.1
Gln_E_t_HS4	Gln_E_t	493	1027	0.18	N	-3.0533	2.844	N	-3.2521	2.9758	0.16
Gln_E_t_HS5	Gln_E_t	493	1027	0.17	OE1	-4.2331	2.7183	OE1	-4.369	2.776	0.33
Glu_H_g-_HS1	Glu_H_g-	3794	9063	0.32	O	-3.8921	3.0199	O	-4.6261	2.7875	0.24
Glu_H_g-_HS2	Glu_H_g-	3794	9063	0.19	OE1	-6.2214	2.6865	OE1	-6.2139	2.6875	0
Glu_H_g-_HS3	Glu_H_g-	3794	9063	0.17	OE2	-5.3123	2.373	OE2	-8.7041	2.6602	0.3
Glu_H_g-_HS4	Glu_H_g-	3794	9063	0.14	OE1	-3.7964	3.1091	OE1	-6.8288	2.6732	0.87
Glu_H_g+_HS1	Glu_H_g+	132	335	0.3	O	-4.3343	2.7053	O	-4.6396	2.793	0.31
Glu_H_g+_HS2	Glu_H_g+	132	335	0.2	OE2	-8.2534	2.5975	OE2	-8.2087	2.6677	0.07
Glu_H_g+_HS3	Glu_H_g+	132	335	0.19	N	-3.3761	2.7644	N	-4.1511	2.9478	0.18
Glu_H_g+_HS4	Glu_H_g+	132	335	0.16	OE1	-6.6435	2.6454	OE1	-6.8564	2.7068	0.25
Glu_H_g+_HS5	Glu_H_g+	132	335	0.15	OE2	-6.1166	2.4688	OE2	-7.3328	2.659	0.38
Glu_H_g+_HS6	Glu_H_g+	132	335	0.1	OE1	-6.2828	2.7275	OE1	-6.4089	2.6784	0.05
Glu_H_t_HS1	Glu_H_t	2035	5249	0.35	O	-4.8391	2.7392	O	-5.2209	2.7634	0.25
Glu_H_t_HS2	Glu_H_t	2035	5249	0.31	OE1	-5.1262	2.4968	OE1	-6.4451	2.7048	0.22
Glu_H_t_HS3	Glu_H_t	2035	5249	0.26	N	-3.3558	2.8584	N	-3.5219	2.9595	0.11
Glu_H_t_HS4	Glu_H_t	2035	5249	0.21	OE2	-7.7256	2.7043	OE2	-7.8103	2.6749	0.03
Glu_H_t_HS5	Glu_H_t	2035	5249	0.15	OE1	-6.6267	2.5814	OE1	-6.8351	2.6791	0.26
Glu_H_t_HS6	Glu_H_t	2035	5249	0.13	OE2	-5.4767	2.4655	OE2	-7.0789	2.679	0.8
Glu_H_t_HS7	Glu_H_t	2035	5249	0.11	OE1	-4.1863	2.966	OE1	-6.0964	2.7215	1.03
Glu_E_g-_HS1	Glu_E_g-	1111	2704	0.17	OE1	-2.4516	2.3938	OE1	-6.5265	2.7085	0.57
Glu_E_g-_HS2	Glu_E_g-	1111	2704	0.15	OE2	-7.5207	2.5318	OE2	-7.9151	2.6717	0.14
Glu_E_g-_HS3	Glu_E_g-	1111	2704	0.14	OE2	-6.3454	2.5015	OE2	-7.1332	2.6751	0.17
Glu_E_g-_HS4	Glu_E_g-	1111	2704	0.14	N	-3.6343	2.8446	N	-3.861	2.9275	0.16
Glu_E_g-_HS5	Glu_E_g-	1111	2704	0.12	OE1	-6.9261	2.5916	OE1	-7.012	2.673	0.1
Glu_E_g+_HS1	Glu_E_g+	269	566	0.21	OE2	-7.0749	2.5382	OE2	-7.5213	2.6535	0.38
Glu_E_g+_HS2	Glu_E_g+	269	566	0.19	OE1	-6.011	2.8554	OE1	-7.1664	2.6909	0.5
Glu_E_g+_HS3	Glu_E_g+	269	566	0.14	OE1	-6.236	2.5514	OE1	-6.5501	2.676	0.13
Glu_E_g+_HS4	Glu_E_g+	269	566	0.13	N	-3.1284	2.994	O	-5.3673	2.7696	0.63
Glu_E_g+_HS5	Glu_E_g+	269	566	0.1	OE2	-8.1401	2.6301	OE2	-8.0974	2.678	0.07
Glu_E_g+_HS6	Glu_E_g+	269	566	0.1	OE2	-5.4763	2.9475	OE2	-8.1337	2.6712	1.82
Glu_E_t_HS1	Glu_E_t	1107	2608	0.24	OE2	-8.6094	2.7873	OE2	-9.6467	2.6367	0.16
Glu_E_t_HS2	Glu_E_t	1107	2608	0.23	OE1	-6.4927	2.6716	OE1	-6.4421	2.723	0.06
Glu_E_t_HS3	Glu_E_t	1107	2608	0.19	OE2	-7.3113	2.4643	OE2	-8.3136	2.64	0.35
Glu_E_t_HS4	Glu_E_t	1107	2608	0.18	N	-2.6772	3.1715	N	-3.5557	2.9469	0.56
Glu_E_t_HS5	Glu_E_t	1107	2608	0.17	OE1	-6.1512	2.5873	OE1	-6.3011	2.6823	0.1
Gly_H_NA_HS1	Gly_H_NA	5888	3371	0.24	O	-4.3253	2.7764	O	-4.3604	2.7906	0.03
Gly_H_NA_HS2	Gly_H_NA	5888	3371	0.12	N	-3.5108	2.854	N	-3.609	2.9022	0.07
Gly_E_NA_HS1	Gly_E_NA	7013	2669	0.06	O	-3.0361	2.7526	O	-4.588	2.7964	1.7
Gly_E_NA_HS2	Gly_E_NA	7013	2669	0.04	O	-3.482	2.7144	O	-3.8151	2.834	0.3
Gly_E_NA_HS3	Gly_E_NA	7013	2669	0.03	N	-2.778	2.7478	N	-3.5906	2.9496	0.23
Gly_E_NA_HS4	Gly_E_NA	7013	2669	0.03	O	-2.1731	2.6613	O	-2.6751	2.8422	0.19
His_H_g-_HS1	His_H_g-	646	1110	0.41	ND1	-7.0262	2.7631	ND1	-7.5524	2.7838	0.23
His_H_g-_HS2	His_H_g-	646	1110	0.33	NE2	-3.7742	2.7645	NE2	-4.0595	2.8617	0.24
His_H_g+_HS1	His_H_g+	69	112	0.55	ND1	-8.8308	2.8703	ND1	-10.5021	2.6928	0.27
His_H_g+_HS2	His_H_g+	69	112	0.44	O	-4.9359	2.6807	O	-5.2113	2.7612	0.38
His_H_g+_HS3	His_H_g+	69	112	0.29	NE2	-3.563	2.721	NE2	-3.967	2.8419	0.14
His_H_g+_HS4	His_H_g+	69	112	0.13	O	-3.8871	2.915	O	-4.422	2.7811	0.52
His_H_t_HS1	His_H_t	773	1123	0.25	ND1	-6.3567	2.5477	ND1	-7.7645	2.7782	0.35
His_H_t_HS2	His_H_t	773	1123	0.2	NE2	-3.9081	2.8547	NE2	-3.9081	2.8577	0
His_H_t_HS3	His_H_t	773	1123	0.16	O	-5.4722	2.5705	O	-7.7117	2.8333	0.84
His_E_g-_HS1	His_E_g-	689	906	0.31	NE2	-3.1521	2.6942	NE2	-3.9741	2.8751	0.33
His_E_g-_HS2	His_E_g-	689	906	0.26	ND1	-7.245	2.8393	ND1	-7.5509	2.7659	0.08
His_E_g-_HS3	His_E_g-	689	906	0.15	N	-3.6279	2.8187	N	-3.9769	2.9455	0.16
His_E_g+_HS1	His_E_g+	198	263	0.35	ND1	-7.341	2.522	ND1	-8.7363	2.7489	0.23
His_E_g+_HS2	His_E_g+	198	263	0.28	NE2	-3.7214	2.8416	NE2	-3.8019	2.8815	0.24
His_E_g+_HS3	His_E_g+	198	263	0.11	N	-3.5768	2.8928	O	-5.9353	2.7659	0.77
His_E_t_HS1	His_E_t	326	406	0.3	NE2	-3.3669	2.7267	NE2	-3.8863	2.8869	0.17
His_E_t_HS2	His_E_t	326	406	0.24	ND1	-6.2123	2.8595	ND1	-6.8396	2.775	0.34
His_E_t_HS3	His_E_t	326	406	0.12	O	-3.6322	2.8525	O	-4.0954	2.7946	0.43
His_E_t_HS4	His_E_t	326	406	0.1	N	-2.2987	2.6835	N	-3.856	2.931	0.5
Ile_H_g-_HS1	Ile_H_g-	7453	2149	0.12	O	-5.0801	2.7296	O	-5.1455	2.7716	0.25
Ile_H_g+_HS1	Ile_H_g+	518	344	0.15	O	-4.246	2.6097	O	-4.8987	2.7903	0.44
Ile_H_t_HS1	Ile_H_t	456	214	0.42	N	-4.235	2.8848	N	-4.2912	2.9414	0.06
Ile_E_g-_HS1	Ile_E_g-	7944	3463	0.15	N	-3.7325	2.8983	N	-3.7354	2.9041	0.01
Ile_E_t_HS1	Ile_E_t	1029	380	0.13	N	-5.1656	2.9827	O	-5.7501	2.7673	0.28
Leu_H_g-_HS1	Leu_H_g-	12894	5551	0.22	O	-4.376	2.7219	O	-4.4533	2.807	0.12
Leu_H_g+_HS1	Leu_H_g+	45	23	0.43	O	-4.703	2.8878	O	-5.2198	2.7682	0.35
Leu_H_t_HS1	Leu_H_t	6537	1497	0.13	N	-3.9284	2.9028	N	-3.9404	2.9122	0.01
Leu_E_g-_HS1	Leu_E_g-	6115	2801	0.14	N	-3.8257	2.8922	N	-3.8275	2.8935	0
Leu_E_t_HS1	Leu_E_t	5337	2538	0.14	N	-3.3423	2.8726	N	-3.4803	2.9647	0.1
Lys_H_g-_HS1	Lys_H_g-	2135	4119	0.43	O	-3.7533	2.6076	O	-4.4675	2.7942	0.19
Lys_H_g-_HS2	Lys_H_g-	2135	4119	0.23	NZ	-5.3756	2.9846	NZ	-6.1585	2.78	0.31
Lys_H_g-_HS3	Lys_H_g-	2135	4119	0.16	NZ	-5.7585	2.6851	NZ	-5.9974	2.7707	0.19
Lys_H_g-_HS4	Lys_H_g-	2135	4119	0.15	NZ	-5.8095	2.6722	NZ	-6.1009	2.7852	0.12
Lys_H_g+_HS1	Lys_H_g+	119	250	0.33	O	-3.9414	2.583	O	-4.7708	2.7774	0.2
Lys_H_g+_HS2	Lys_H_g+	119	250	0.26	NZ	-5.91	2.8463	NZ	-6.0254	2.7686	0.1
Lys_H_g+_HS3	Lys_H_g+	119	250	0.2	N	-4.1858	2.9734	N	-4.13	2.9296	0.05
Lys_H_g+_HS4	Lys_H_g+	119	250	0.19	NZ	-5.886	2.7711	NZ	-5.8822	2.778	0.04
Lys_H_g+_HS5	Lys_H_g+	119	250	0.16	NZ	-5.7766	2.6917	NZ	-6.069	2.7849	0.2
Lys_H_g+_HS6	Lys_H_g+	119	250	0.11	O	-2.4897	2.59	O	-4.1729	2.8013	0.94
Lys_H_t_HS1	Lys_H_t	1442	2440	0.3	O	-4.9138	2.6558	O	-5.1633	2.771	0.25
Lys_H_t_HS2	Lys_H_t	1442	2440	0.18	NZ	-5.9099	2.7288	NZ	-6.0907	2.7775	0.25
Lys_H_t_HS3	Lys_H_t	1442	2440	0.15	NZ	-6.0635	2.8162	NZ	-6.0872	2.7735	0.04
Lys_H_t_HS4	Lys_H_t	1442	2440	0.14	NZ	-5.8446	2.7192	NZ	-5.9437	2.7852	0.09
Lys_E_g-_HS1	Lys_E_g-	813	1446	0.23	N	-3.7483	2.9455	N	-3.7865	2.9081	0.13
Lys_E_g-_HS2	Lys_E_g-	813	1446	0.19	NZ	-5.794	2.7602	NZ	-5.7948	2.7599	0
Lys_E_g-_HS3	Lys_E_g-	813	1446	0.19	NZ	-5.9674	2.8167	NZ	-5.9925	2.7855	0.03
Lys_E_g-_HS4	Lys_E_g-	813	1446	0.18	NZ	-5.9344	2.7433	NZ	-6.0336	2.7813	0.16
Lys_E_g+_HS1	Lys_E_g+	268	437	0.19	NZ	-5.6397	2.8986	NZ	-5.9728	2.7699	0.14
Lys_E_g+_HS2	Lys_E_g+	268	437	0.17	NZ	-3.1314	2.4951	NZ	-6.0024	2.7758	0.3
Lys_E_g+_HS3	Lys_E_g+	268	437	0.17	NZ	-4.1981	2.5489	NZ	-6.0427	2.7922	0.25
Lys_E_t_HS1	Lys_E_t	812	1511	0.15	NZ	-5.8987	2.7299	NZ	-5.9928	2.7668	0.1
Lys_E_t_HS2	Lys_E_t	812	1511	0.13	NZ	-5.3054	2.6226	NZ	-5.9683	2.7849	0.17
Lys_E_t_HS3	Lys_E_t	812	1511	0.12	NZ	-4.9102	3.0291	NZ	-6.0797	2.7765	0.38
Lys_E_t_HS4	Lys_E_t	812	1511	0.12	O	-2.9232	2.9935	O	-3.2237	2.8204	0.31
Met_H_g-_HS1	Met_H_g-	624	271	0.23	O	-3.8383	2.9293	O	-4.1694	2.7956	0.2
Met_H_g+_HS1	Met_H_g+	23	13	0.22	O	-3.5253	2.5924	O	-4.8724	2.7538	0.48
Met_H_g+_HS2	Met_H_g+	23	13	0.14	O	4.0158	2.2923	O	-5.1583	2.749	0.53
Met_H_t_HS1	Met_H_t	252	61	0.15	N	-3.8678	3.0003	N	-3.9554	2.9218	0.08
Met_E_t_HS1	Met_E_t	226	105	0.13	N	-3.3051	2.822	N	-3.6791	2.9319	0.18
Phe_H_g-_HS1	Phe_H_g-	911	426	0.17	O	-4.7109	2.6767	O	-4.9959	2.7831	0.5
Phe_H_g+_HS1	Phe_H_g+	35	26	0.26	O	-3.4919	2.5189	O	-5.133	2.7733	0.31
Phe_H_g+_HS2	Phe_H_g+	35	26	0.19	N	-3.1005	2.8706	N	-3.4094	2.9868	0.13
Phe_H_t_HS1	Phe_H_t	2411	669	0.11	N	-3.8187	2.8262	N	-4.0099	2.927	0.11
Phe_H_t_HS2	Phe_H_t	2411	669	0.11	O	-5.9341	2.8143	O	-6.1663	2.7383	0.11
Phe_E_g-_HS1	Phe_E_g-	1911	846	0.18	N	-3.8363	2.8094	N	-4.1208	2.9351	0.14
Phe_E_t_HS1	Phe_E_t	910	511	0.14	N	-3.3505	2.904	N	-3.4471	2.9367	0.23
Phe_E_t_HS2	Phe_E_t	910	511	0.11	O	-3.396	3.0372	O	-4.27	2.8	0.3
Pro_H_g-_HS1	Pro_H_g-	2728	1480	0.29	O	-4.4899	2.7132	O	-4.5874	2.8001	0.09
Pro_H_g+_HS1	Pro_H_g+	977	500	0.24	O	-4.6447	2.7477	O	-4.6558	2.7484	0
Pro_E_g-_HS1	Pro_E_g-	1200	906	0.44	O	-4.9334	2.692	O	-4.9841	2.7647	0.2
Pro_E_g-_HS2	Pro_E_g-	1200	906	0.15	O	-3.9813	2.7198	O	-4.1192	2.774	0.28
Pro_E_g+_HS1	Pro_E_g+	1399	1023	0.32	O	-5.0721	2.697	O	-5.3846	2.7705	0.34
Pro_E_g+_HS2	Pro_E_g+	1399	1023	0.12	O	-3.854	2.8309	O	-3.9091	2.7957	0.04
Ser_H_g-_HS1	Ser_H_g-	3341	4779	0.38	O	-4.3088	2.7733	O	-4.3139	2.7739	0
Ser_H_g-_HS2	Ser_H_g-	3341	4779	0.25	OG	-3.2393	2.7617	OG	-3.5599	2.8619	0.43
Ser_H_g-_HS3	Ser_H_g-	3341	4779	0.22	OG	-5.198	2.6726	OG	-5.3496	2.7413	0.07
Ser_H_g-_HS4	Ser_H_g-	3341	4779	0.18	OG	-3.1305	2.6123	OG	-4.0004	2.8193	0.25
Ser_H_g-_HS5	Ser_H_g-	3341	4779	0.12	N	-4.4988	2.9539	OG	-5.9095	2.7935	0.48
Ser_H_g+_HS1	Ser_H_g+	3311	4877	0.4	O	-4.9251	2.7069	O	-5.0587	2.7843	0.28
Ser_H_g+_HS2	Ser_H_g+	3311	4877	0.28	OG	-5.3816	2.6296	OG	-6.6394	2.7967	1.18
Ser_H_g+_HS3	Ser_H_g+	3311	4877	0.23	N	-4.1338	2.9777	OG	-6.1225	2.7869	1.44
Ser_H_g+_HS4	Ser_H_g+	3311	4877	0.17	OG	-5.1505	2.6953	OG	-5.2261	2.7662	0.08
Ser_H_t_HS1	Ser_H_t	1857	2828	0.24	OG	-5.7998	2.7036	OG	-6.2135	2.7535	0.63
Ser_H_t_HS2	Ser_H_t	1857	2828	0.23	O	-5.5118	2.8505	O	-6.3153	2.8167	0.37
Ser_E_g-_HS1	Ser_E_g-	1939	2989	0.41	OG	-4.1289	2.7064	OG	-4.2773	2.8452	0.15
Ser_E_g-_HS2	Ser_E_g-	1939	2989	0.21	N	-3.6791	2.8684	N	-3.7478	2.9185	0.05
Ser_E_g-_HS3	Ser_E_g-	1939	2989	0.19	OG	-3.9488	2.5567	OG	-5.1607	2.7662	0.53
Ser_E_g+_HS1	Ser_E_g+	2787	3734	0.34	OG	-4.6355	2.7398	OG	-4.8319	2.8293	0.13
Ser_E_g+_HS2	Ser_E_g+	2787	3734	0.32	OG	-3.9659	2.7308	OG	-4.402	2.8616	0.44
Ser_E_g+_HS3	Ser_E_g+	2787	3734	0.18	OG	-3.4071	2.5183	OG	-5.1773	2.7656	0.25
Ser_E_g+_HS4	Ser_E_g+	2787	3734	0.1	N	-2.4004	3.0383	O	-6.134	2.8376	1.34
Ser_E_t_HS1	Ser_E_t	2387	3105	0.22	OG	-2.8391	2.5892	OG	-3.9903	2.8381	0.29
Ser_E_t_HS2	Ser_E_t	2387	3105	0.16	OG	-4.0793	2.7728	OG	-4.0966	2.7863	0.02
Ser_E_t_HS3	Ser_E_t	2387	3105	0.14	OG	-4.518	2.6316	OG	-4.9784	2.7782	0.15
Ser_E_t_HS4	Ser_E_t	2387	3105	0.14	N	-2.3529	2.69	N	-3.8926	2.9314	0.39
Thr_H_g-_HS1	Thr_H_g-	5421	6974	0.22	OG1	-5.1579	2.6376	OG1	-5.5033	2.7547	0.16
Thr_H_g-_HS2	Thr_H_g-	5421	6974	0.2	O	-4.9298	2.74	O	-5.0557	2.7633	0.2
Thr_H_g-_HS3	Thr_H_g-	5421	6974	0.16	OG1	-3.6099	2.6289	OG1	-4.4316	2.8289	0.32
Thr_H_g-_HS4	Thr_H_g-	5421	6974	0.13	OG1	-3.6258	2.7434	OG1	-3.9853	2.8467	0.35
Thr_H_g+_HS1	Thr_H_g+	2177	2877	0.3	O	-4.5954	2.7211	O	-4.6728	2.7989	0.12
Thr_H_g+_HS2	Thr_H_g+	2177	2877	0.22	OG1	-4.2672	2.5587	OG1	-6.2368	2.7835	1.01
Thr_H_g+_HS3	Thr_H_g+	2177	2877	0.19	OG1	-5.2277	2.7006	OG1	-5.3419	2.7646	0.17
Thr_H_t_HS1	Thr_H_t	85	116	0.18	N	-3.9466	2.7691	N	-4.401	2.9197	0.16
Thr_H_t_HS2	Thr_H_t	85	116	0.14	OG1	-4.9258	2.8852	O	-6.2391	2.8079	0.62
Thr_E_g-_HS1	Thr_E_g-	5047	8924	0.45	OG1	-4.3697	2.7275	OG1	-4.4409	2.8552	0.15
Thr_E_g-_HS2	Thr_E_g-	5047	8924	0.3	OG1	-4.5671	2.6667	OG1	-5.0684	2.7812	0.92
Thr_E_g-_HS3	Thr_E_g-	5047	8924	0.23	N	-3.5572	2.8515	O	-6.2536	2.759	1.18
Thr_E_g-_HS4	Thr_E_g-	5047	8924	0.15	O	-3.3848	2.8297	O	-3.3652	2.8234	0.01
Thr_E_g+_HS1	Thr_E_g+	3179	4400	0.22	OG1	-4.2361	2.8368	OG1	-4.2189	2.838	0
Thr_E_g+_HS2	Thr_E_g+	3179	4400	0.18	OG1	-3.0444	2.5024	OG1	-5.0927	2.7647	0.26
Thr_E_g+_HS3	Thr_E_g+	3179	4400	0.15	OG1	-4.0655	2.7995	OG1	-4.3813	2.8045	0.45
Thr_E_t_HS1	Thr_E_t	1296	1168	0.16	OG1	-3.5382	2.8625	OG1	-3.5321	2.8615	0
Thr_E_t_HS2	Thr_E_t	1296	1168	0.15	OG1	-2.1437	2.4803	OG1	-5.4693	2.7841	1
Thr_E_t_HS3	Thr_E_t	1296	1168	0.14	OG1	-4.8846	2.6644	OG1	-5.1283	2.7637	0.13
Trp_H_g-_HS1	Trp_H_g-	266	176	0.3	NE1	-2.7203	2.6879	NE1	-3.7999	2.8843	0.22
Trp_H_g-_HS2	Trp_H_g-	266	176	0.11	N	-3.445	2.7298	N	-4.3872	2.9384	0.21
Trp_H_g+_HS1	Trp_H_g+	94	109	0.53	N	-3.9228	2.8405	N	-4.0989	2.9809	0.23
Trp_H_g+_HS2	Trp_H_g+	94	109	0.35	O	-5.1492	2.6156	O	-5.6121	2.7526	0.25
Trp_H_g+_HS3	Trp_H_g+	94	109	0.31	NE1	-3.7466	2.8344	NE1	-3.9623	2.8807	0.06
Trp_H_t_HS1	Trp_H_t	339	236	0.3	NE1	-3.5801	2.7613	NE1	-3.994	2.8915	0.26
Trp_H_t_HS2	Trp_H_t	339	236	0.2	O	-6.2959	2.7918	O	-6.4346	2.7536	0.24
Trp_E_g-_HS1	Trp_E_g-	496	637	0.45	N	-3.8154	2.9984	N	-3.8759	2.9479	0.08
Trp_E_g-_HS2	Trp_E_g-	496	637	0.31	NE1	-3.6565	2.8799	NE1	-3.6829	2.9074	0.1
Trp_E_g-_HS3	Trp_E_g-	496	637	0.12	O	-2.3022	2.6322	O	-6.1068	2.769	2.27
Trp_E_g-_HS4	Trp_E_g-	496	637	0.11	O	-3.4251	2.6932	O	-6.1437	2.7761	2.2
Trp_E_g+_HS1	Trp_E_g+	127	81	0.35	NE1	-3.0258	3.0711	NE1	-3.2309	2.9469	0.13
Trp_E_g+_HS2	Trp_E_g+	127	81	0.1	O	-3.1498	3.1172	O	-4.5255	2.802	0.69
Trp_E_t_HS1	Trp_E_t	92	63	0.23	NE1	-3.6722	2.8657	NE1	-3.671	2.8658	0
Trp_E_t_HS2	Trp_E_t	92	63	0.11	N	-3.24	2.8615	N	-3.3719	2.9737	0.12
Tyr_H_g-_HS1	Tyr_H_g-	644	884	0.31	O	-4.8312	2.6433	O	-5.1866	2.7897	0.2
Tyr_H_g-_HS2	Tyr_H_g-	644	884	0.24	OH	-2.4183	2.7325	OH	-2.9834	2.9022	0.25
Tyr_H_g-_HS3	Tyr_H_g-	644	884	0.22	OH	-3.1611	2.4431	OH	-6.0341	2.7268	0.32
Tyr_H_g+_HS1	Tyr_H_g+	42	66	0.26	OH	-2.8538	2.801	OH	-3.2367	2.8593	0.47
Tyr_H_g+_HS2	Tyr_H_g+	42	66	0.24	OH	-5.2888	2.6651	OH	-5.3726	2.7593	0.34
Tyr_H_g+_HS3	Tyr_H_g+	42	66	0.19	N	-3.162	2.87	N	-3.348	2.9637	0.11
Tyr_H_g+_HS4	Tyr_H_g+	42	66	0.14	O	1.095	2.3993	O	-4.25	2.7914	0.88
Tyr_H_t_HS1	Tyr_H_t	1585	1900	0.27	OH	-4.4393	2.5114	OH	-5.7574	2.7414	0.34
Tyr_H_t_HS2	Tyr_H_t	1585	1900	0.25	OH	-2.5737	2.6898	OH	-3.1202	2.8779	0.19
Tyr_H_t_HS3	Tyr_H_t	1585	1900	0.16	O	-6.1604	2.6746	O	-6.2409	2.7464	0.08
Tyr_H_t_HS4	Tyr_H_t	1585	1900	0.11	N	-3.9902	2.9833	N	-4.0506	2.9314	0.15
Tyr_E_g-_HS1	Tyr_E_g-	1338	1738	0.28	OH	-3.0124	2.8605	OH	-3.1334	2.8874	0.17
Tyr_E_g-_HS2	Tyr_E_g-	1338	1738	0.25	OH	-3.2532	2.4678	OH	-5.6302	2.7459	0.36
Tyr_E_g-_HS3	Tyr_E_g-	1338	1738	0.12	N	-3.7364	3.0419	N	-4.041	2.9344	0.24
Tyr_E_g+_HS1	Tyr_E_g+	525	691	0.3	OH	-2.6233	2.6491	OH	-3.3628	2.8466	0.21
Tyr_E_g+_HS2	Tyr_E_g+	525	691	0.29	OH	-5.3352	2.6657	OH	-5.6694	2.7474	0.27
Tyr_E_g+_HS3	Tyr_E_g+	525	691	0.1	N	-2.2537	3.2019	N	-2.8537	3.0181	0.21
Tyr_E_t_HS1	Tyr_E_t	757	1057	0.22	OH	-1.5199	2.5831	OH	-3.1981	2.8657	0.31
Tyr_E_t_HS2	Tyr_E_t	757	1057	0.14	OH	-5.4818	2.5979	OH	-5.9383	2.7346	0.31
Tyr_E_t_HS3	Tyr_E_t	757	1057	0.11	N	-3.4883	2.9452	N	-3.7068	2.939	0.35
Tyr_E_t_HS4	Tyr_E_t	757	1057	0.1	O	-4.286	2.8113	O	-4.2782	2.8106	0
Val_H_g-_HS1	Val_H_g-	910	536	0.15	O	-4.5426	2.6448	O	-4.9739	2.7762	0.31
Val_H_g+_HS1	Val_H_g+	540	309	0.44	N	-4.2621	2.9141	N	-4.2915	2.9473	0.04
Val_H_g+_HS2	Val_H_g+	540	309	0.13	O	-5.2219	2.774	O	-5.6911	2.7603	0.71
Val_H_t_HS1	Val_H_t	9725	2937	0.17	O	-4.6732	2.7101	O	-4.7645	2.7961	0.1
Val_E_g+_HS1	Val_E_g+	1494	541	0.11	N	-2.4452	3.0103	O	-5.7588	2.7445	0.73
Val_E_t_HS1	Val_E_t	13764	6911	0.17	N	-3.6972	2.8542	N	-3.8624	2.9268	0.09
